# Supplementary material for: A real-world feasibility evaluation of LLM-based clinical prediction: emergency department return visit admission across two academic medical centers
Source: Research Square preprint supplement (doi:10.21203/rs.3.rs-9733941/v1), 2026-06-02
Supplement: Supplementary file 1 [file f22fda1c7571d444b77b12e3.pdf]

## Supplementary Information

### Prompts

| Prompt for Severity Assessment |                                                                                                                                                                                                                                                                                                                                                                                                                                                                                                                                                                    |
|--------------------------------|--------------------------------------------------------------------------------------------------------------------------------------------------------------------------------------------------------------------------------------------------------------------------------------------------------------------------------------------------------------------------------------------------------------------------------------------------------------------------------------------------------------------------------------------------------------------|
| system_prompt                  | You are an emergency medicine expert. Analyze patient data to assess severity of illness.                                                                                                                                                                                                                                                                                                                                                                                                                                                                          |
| user_prompt                    | Analyze the following patient data to assess the severity of illness:<br>Demographics: {demographics}<br>Conditions: {conditions}<br>Drugs: {}<br>Measurements: {}<br>Observations: {}<br>Procedures: {}<br>Notes: {}<br>Provide:<br>1. Severity Level: (Critical/Moderate/Low)<br>2. Summary: Brief clinical summary of key findings<br>3. Risk Factors: List key factors that increase risk of ED return visits that lead to hospital admissions<br>Format your response as:<br>Severity Level: [level]<br>Summary: [summary]<br>Risk Factors: [list of factors] |

| Prompt for RVA Prediction |                                                                                                                                                                                                                                                                                                                                                                                                                                                                                                                                                                                                                                                                                                                                                                         |
|---------------------------|-------------------------------------------------------------------------------------------------------------------------------------------------------------------------------------------------------------------------------------------------------------------------------------------------------------------------------------------------------------------------------------------------------------------------------------------------------------------------------------------------------------------------------------------------------------------------------------------------------------------------------------------------------------------------------------------------------------------------------------------------------------------------|
| system_prompt             | You are an expert in emergency medicine and predictive risk assessment. You will receive comprehensive details of a patient's emergency department (ED) visit that ended in discharge along with patient demographics, medical history, and prior healthcare utilization data. Your task is to evaluate this information and determine whether the patient will (i) return to the ED within 9 days of discharge and (ii) subsequently be admitted to the hospital following that return ED visit. This is called return visit admission (RVA). Base your judgment strictly on the provided data. If making a prediction, respond exactly as instructed in the user prompt without adding extra commentary.<br>A prior knowledge is that RVA is pretty rare in practice. |
| user_prompt               | You are provided with comprehensive, processed details of a patient's emergency department (ED) visit that resulted in discharge. The data may include: demographics, diagnoses, devices, medications, measurements, observations, procedures, and clinical notes.                                                                                                                                                                                                                                                                                                                                                                                                                                                                                                      |

|  |                                                                                                                                                                                                                                                                                                                                                                                                                                                                                                                                                                                                                                                                                                                                                                                                                                                                                                                                                                                                                                                                                                                                                                                                                                                                                                                                                                                                                                                                                                                                                                                                   |
|--|---------------------------------------------------------------------------------------------------------------------------------------------------------------------------------------------------------------------------------------------------------------------------------------------------------------------------------------------------------------------------------------------------------------------------------------------------------------------------------------------------------------------------------------------------------------------------------------------------------------------------------------------------------------------------------------------------------------------------------------------------------------------------------------------------------------------------------------------------------------------------------------------------------------------------------------------------------------------------------------------------------------------------------------------------------------------------------------------------------------------------------------------------------------------------------------------------------------------------------------------------------------------------------------------------------------------------------------------------------------------------------------------------------------------------------------------------------------------------------------------------------------------------------------------------------------------------------------------------|
|  | <p>A prior knowledge is that RVA is pretty rare in practice.<br/> Here are examples to guide your prediction:<br/> <b>POSITIVE EXAMPLES (Readmitted within 9 days):</b><br/> Example 1:<br/> Demographics: {demographics}<br/> Severity Assessment: {severity_summary})<br/> Key Conditions: {conditions}<br/> Key Medications: {medications}<br/> Key Measurements: {measurements}<br/> Key Observations: {observations}<br/> Key Procedures: {procedures}<br/> Outcome: Yes (readmitted)<br/> Example 2:<br/> .....<br/> <b>NEGATIVE EXAMPLES (Not readmitted within 9 days):</b><br/> Example 1:<br/> Demographics: {demographics}<br/> Severity Assessment: {severity_summary})<br/> Key Conditions: {conditions}<br/> Key Medications: {medications}<br/> Key Measurements: {measurements}<br/> Key Observations: {observations}<br/> Key Procedures: {procedures}<br/> Outcome: No (not readmitted)<br/> Example 2:<br/> .....<br/> Now, based on these examples and the following patient data, predict whether the patient will return to the ED within {self.rva_interval_days} days of discharge and be admitted to inpatient care at the end of that ED evaluation. Use your clinical reasoning to weigh risk factors. Do not request additional information.<br/> Based solely on this information, respond with:<br/> - "Yes" if ED return visits that lead to hospital admissions is likely<br/> - "No" if ED return visits that lead to hospital admissions is unlikely<br/> - "I don't know" if insufficient information<br/> Respond with only one word: Yes/No/I don't know</p> |
|--|---------------------------------------------------------------------------------------------------------------------------------------------------------------------------------------------------------------------------------------------------------------------------------------------------------------------------------------------------------------------------------------------------------------------------------------------------------------------------------------------------------------------------------------------------------------------------------------------------------------------------------------------------------------------------------------------------------------------------------------------------------------------------------------------------------------------------------------------------------------------------------------------------------------------------------------------------------------------------------------------------------------------------------------------------------------------------------------------------------------------------------------------------------------------------------------------------------------------------------------------------------------------------------------------------------------------------------------------------------------------------------------------------------------------------------------------------------------------------------------------------------------------------------------------------------------------------------------------------|

**Note classes**

In our dataset, there are following classes of notes used for predicting RVA:

Addendum Document, Evaluation and management, Timeout to verify correct patient, correct site, and correct procedure, documented (PATH), Transfer of care, Report, History and physical, Assessment, Procedure note, Care provider notes, Behavioral health, Chart review by physician, Nurse, Emergency

department Note, Operation note, Hospital course Narrative, Consults, Nursing notes, Mini-Mental Status Examination, Disposition, Order, Event, Discharge note, Note, Encounter note, Care plan, Procedure, Group counseling, Triage note, Progress

Table S1. Note class percentage summary at WCM

| Note Class                                                                                | All % | RVA=0 % | RVA=1 % |
|-------------------------------------------------------------------------------------------|-------|---------|---------|
| Order                                                                                     | 45.96 | 46.00   | 43.00   |
| Care provider notes                                                                       | 23.02 | 23.05   | 20.99   |
| Triage note                                                                               | 10.14 | 10.15   | 9.94    |
| Progress                                                                                  | 5.55  | 5.53    | 7.06    |
| Mini-Mental Status Examination                                                            | 4.10  | 4.11    | 3.78    |
| Emergency department Note                                                                 | 4.04  | 4.01    | 6.16    |
| Procedure note                                                                            | 2.63  | 2.64    | 1.99    |
| Consults                                                                                  | 2.10  | 2.09    | 2.84    |
| Encounter note                                                                            | 0.76  | 0.75    | 1.15    |
| Behavioral health                                                                         | 0.26  | 0.26    | 0.33    |
| Disposition                                                                               | 0.22  | 0.22    | 0.50    |
| History and physical                                                                      | 0.22  | 0.22    | 0.34    |
| Assessment                                                                                | 0.22  | 0.21    | 0.46    |
| Nursing notes                                                                             | 0.13  | 0.13    | 0.20    |
| Event                                                                                     | 0.12  | 0.12    | 0.23    |
| Discharge note                                                                            | 0.10  | 0.10    | 0.16    |
| Evaluation and management                                                                 | 0.06  | 0.06    | 0.04    |
| Transfer of care                                                                          | 0.05  | 0.05    | 0.23    |
| Report                                                                                    | 0.05  | 0.05    | 0.22    |
| Timeout to verify correct patient, correct site, and correct procedure, documented (PATH) | 0.04  | 0.04    | 0.04    |
| Addendum Document                                                                         | 0.04  | 0.04    | 0.05    |

|                           |      |      |      |
|---------------------------|------|------|------|
| Nurse                     | 0.04 | 0.04 | 0.09 |
| Note                      | 0.04 | 0.04 | 0.02 |
| Care plan                 | 0.03 | 0.03 | 0.11 |
| Operation note            | 0.02 | 0.02 | 0.01 |
| Procedure                 | 0.01 | 0.01 | 0.01 |
| Group counseling          | 0.01 | 0.01 | 0.00 |
| Chart review by physician | 0.01 | 0.01 | 0.02 |
| Hospital course Narrative | 0.01 | 0.01 | 0.02 |

Table S2. Percentage of visits having each note class at WCM

| Note Class                     | All Visit % | RVA=0 Visit % | RVA=1 Visit % | Note % |
|--------------------------------|-------------|---------------|---------------|--------|
| Care provider notes            | 99.08       | 99.08         | 98.88         | 23.02  |
| Order                          | 67.60       | 67.54         | 71.77         | 45.96  |
| Triage note                    | 63.31       | 63.24         | 69.21         | 10.14  |
| Mini-Mental Status Examination | 25.97       | 25.96         | 26.62         | 4.10   |
| Progress                       | 22.07       | 21.97         | 29.99         | 5.55   |
| Emergency department Note      | 19.28       | 19.15         | 29.75         | 4.04   |
| Procedure note                 | 14.44       | 14.46         | 13.15         | 2.63   |
| Consults                       | 11.49       | 11.43         | 16.76         | 2.10   |
| Encounter note                 | 3.93        | 3.90          | 6.50          | 0.76   |
| Disposition                    | 1.37        | 1.35          | 3.37          | 0.22   |
| Assessment                     | 1.34        | 1.32          | 3.21          | 0.22   |
| History and physical           | 1.21        | 1.20          | 2.09          | 0.22   |
| Behavioral health              | 0.87        | 0.86          | 1.04          | 0.26   |
| Nursing notes                  | 0.76        | 0.75          | 1.12          | 0.13   |
| Event                          | 0.74        | 0.73          | 1.60          | 0.12   |
| Discharge note                 | 0.54        | 0.54          | 0.96          | 0.10   |
| Transfer of care               | 0.32        | 0.30          | 1.44          | 0.05   |

|                                                                                           |      |      |      |      |
|-------------------------------------------------------------------------------------------|------|------|------|------|
| Timeout to verify correct patient, correct site, and correct procedure, documented (PATH) | 0.28 | 0.28 | 0.32 | 0.04 |
| Report                                                                                    | 0.28 | 0.26 | 1.20 | 0.05 |
| Evaluation and management                                                                 | 0.26 | 0.26 | 0.32 | 0.06 |
| Note                                                                                      | 0.22 | 0.22 | 0.16 | 0.04 |
| Addendum Document                                                                         | 0.22 | 0.22 | 0.40 | 0.04 |
| Nurse                                                                                     | 0.13 | 0.13 | 0.40 | 0.04 |
| Care plan                                                                                 | 0.10 | 0.10 | 0.64 | 0.03 |
| Procedure                                                                                 | 0.07 | 0.07 | 0.08 | 0.01 |
| Operation note                                                                            | 0.07 | 0.07 | 0.08 | 0.02 |
| Chart review by physician                                                                 | 0.05 | 0.05 | 0.08 | 0.01 |
| Hospital course Narrative                                                                 | 0.05 | 0.05 | 0.16 | 0.01 |
| Group counseling                                                                          | 0.01 | 0.01 | 0.00 | 0.01 |

### Embedding and Contrastive Learning

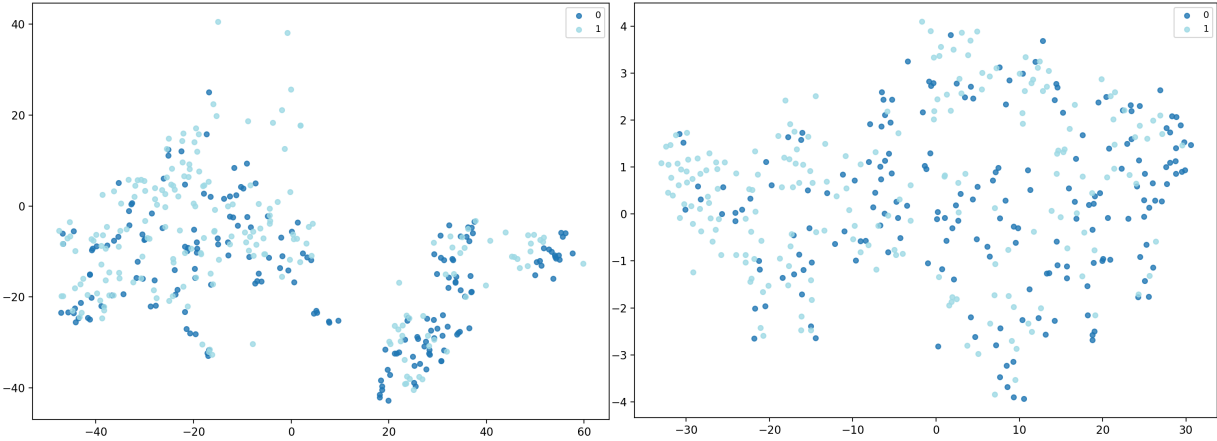

*Figure S1. Plot of 500 RVA and non-RVA cases each embedded by bert-base-uncased and projected to 2-D space. Left is pure embedding, right is results using contrastive learning (WCM).*

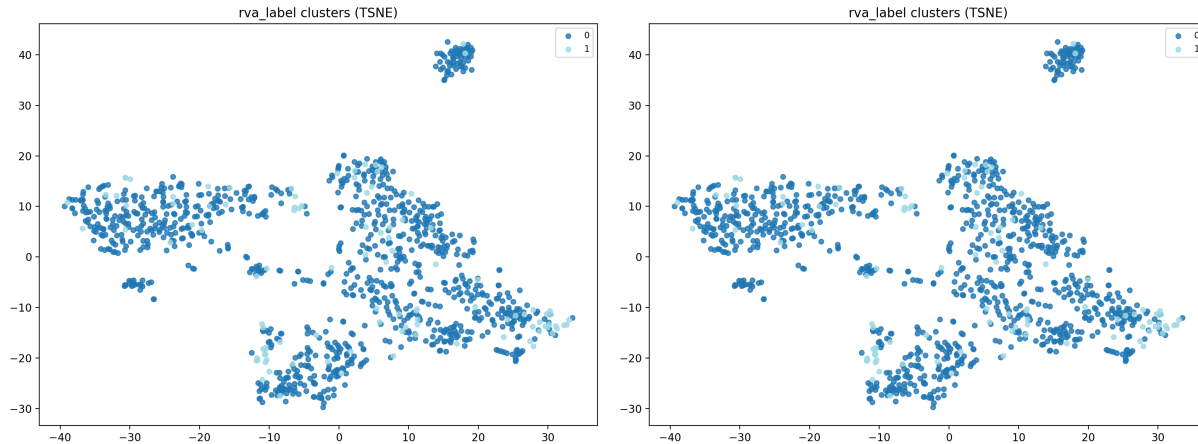

*Figure S2. Plot of 1000 RVA and non-RVA cases each embedded by bert-base-uncased and projected to 2-D space. Left is pure embedding, right is results using contrastive learning (VUMC).*

*Table S3. Prediction performance at VUMC*

| Category                                         | Method                                                               | AUC (95% CI)          | Sensitivity | Specificity | Positive Likelihood Ratio |
|--------------------------------------------------|----------------------------------------------------------------------|-----------------------|-------------|-------------|---------------------------|
|                                                  | Logistic Regression+structured data (80% training)                   | 0.799 (0.755-0.925)   | 0.667       | 0.836       | 4.06                      |
|                                                  | DICE                                                                 | 0.635 (0.620 – 0.723) | 0.833       | 0.599       | 2.079                     |
| Traditional ML baseline & additional embeddings? | CatBoost+structured data (80% training)                              | 0.689 (0.604-0.863)   | 0.439       | 0.906       | 4.67                      |
|                                                  | CatBoost+embedding+structured data +notes                            | 0.765 (0.740-0.790)   | 0.678       | 0.841       | 4.264                     |
|                                                  | CatBoost+embedding+structured data +severity assessment (GPT-5 Mini) | 0.677 (0.657-0.697)   | 0.781       | 0.579       | 1.855                     |
|                                                  | CatBoost+embedding+structured data +severity assessment (Qwen)       | 0.656 (0.631-0.682)   | 0.693       | 0.638       | 1.914                     |
| Baseline                                         | ZS-Disposition baseline (GPT-5 Mini)                                 | 0.610 (0.554 - 0.652) | 0.354       | 0.901       | 3.568                     |
|                                                  | ZS-Disposition Baseline (Qwen)                                       | 0.643 (0.587 - 0.698) | 0.938       | 0.127       | 1.073                     |

|                                        |                                                            |                       |       |       |        |
|----------------------------------------|------------------------------------------------------------|-----------------------|-------|-------|--------|
| Ablation study for severity assessment | GPT-5 Mini+structured data                                 | 0.591 (0.547 - 0.635) | 0.042 | 0.993 | 5.8    |
|                                        | GPT-5 Mini+notes                                           | 0.703 (0.652 - 0.754) | 0.094 | 0.990 | 9.487  |
|                                        | GPT-5 Mini+structured data+notes                           | 0.722 (0.674 - 0.77)  | 0.135 | 0.990 | 12.967 |
|                                        | GPT-5 Mini+structured data+severity assessment(zero shot)  | 0.789 (0.744 - 0.835) | 0.510 | 0.875 | 4.083  |
|                                        | GPT-5 Mini+structured data+severity assessment(one shot)   | 0.769 (0.721 - 0.817) | 0.563 | 0.838 | 3.481  |
|                                        | GPT-5 Mini+structured data+severity assessment(two shot)   | 0.769 (0.726 - 0.811) | 0.552 | 0.815 | 2.978  |
|                                        | GPT-5 Mini+structured data+severity assessment(three shot) | 0.758 (0.707 - 0.809) | 0.604 | 0.792 | 2.911  |
|                                        | Qwen+structured data+severity assessment(zero shot)        | 0.730 (0.683 - 0.777) | 0.604 | 0.753 | 2.449  |
|                                        | Qwen+structured data+severity assessment(one shot)         | 0.684 (0.633 - 0.735) | 0.688 | 0.565 | 1.579  |
|                                        | Qwen+structured data+severity assessment(two shot)         | 0.684 (0.634 - 0.733) | 0.792 | 0.528 | 1.679  |
|                                        | Qwen+structured data+severity assessment(three shot)       | 0.667 (0.617 - 0.717) | 0.729 | 0.514 | 1.5    |

Table S4. Prediction performance at WCM

| Category                                         | Method                                                           | AUC (95% CI)        | Sensitivity | Specificity | Positive Likelihood Ratio |
|--------------------------------------------------|------------------------------------------------------------------|---------------------|-------------|-------------|---------------------------|
|                                                  | Logistic Regression+structured data (80% training)               | 0.691 (0.655-0.727) | 0.633       | 0.676       | 1.956                     |
|                                                  | DICE                                                             | 0.674 (0.641-0.707) | 0.680       | 0.636       | 1.869                     |
| Traditional ML baseline & additional embeddings? | CatBoost+structured data (80% training)                          | 0.723 (0.693-0.753) | 0.745       | 0.594       | 1.836                     |
|                                                  | CatBoost+embedding+structured data +notes                        | 0.666 (0.659-0.672) | 0.611       | 0.662       | 1.852                     |
|                                                  | CatBoost+embedding+structured data +severity assessment (Gemini) | 0.720 (0.714-0.726) | 0.666       | 0.682       | 2.138                     |

|                                        |                                                               |                        |       |       |       |
|----------------------------------------|---------------------------------------------------------------|------------------------|-------|-------|-------|
|                                        | CatBoost+embedding+structured data+severity assessment (Qwen) | 0.712<br>(0.707-0.717) | 0.693 | 0.638 | 1.942 |
| Baseline                               | ZS-Disposition baseline (Gemini)                              | 0.672<br>(0.658-0.687) | 0.866 | 0.368 | 1.369 |
|                                        | ZS-Disposition Baseline (Qwen)                                | 0.662<br>(0.646-0.679) | 0.966 | 0.067 | 1.036 |
| Ablation study for severity assessment | Gemini+structured data                                        | 0.551<br>(0.537-0.565) | 0.018 | 0.994 | 2.937 |
|                                        | Gemini+notes                                                  | 0.645<br>(0.630-0.660) | 0.144 | 0.965 | 4.131 |
|                                        | Gemini+structured data+notes                                  | 0.675<br>(0.661-0.689) | 0.136 | 0.963 | 3.710 |
|                                        | Gemini+structured data+severity assessment(zero shot)         | 0.703<br>(0.686-0.720) | 0.570 | 0.779 | 2.584 |
|                                        | Gemini+structured data+severity assessment(one shot)          | 0.733<br>(0.718-0.748) | 0.697 | 0.687 | 2.225 |
|                                        | Gemini+structured data+severity assessment(two shot)          | 0.738<br>(0.723-0.752) | 0.704 | 0.677 | 2.178 |
|                                        | Gemini+structured data+severity assessment(three shot)        | 0.746<br>(0.732-0.760) | 0.737 | 0.660 | 2.168 |
|                                        | Qwen+structured data+severity assessment(zero shot)           | 0.683<br>(0.666-0.699) | 0.512 | 0.784 | 2.365 |
|                                        | Qwen+structured data+severity assessment(one shot)            | 0.712<br>(0.698-0.726) | 0.733 | 0.578 | 1.736 |
|                                        | Qwen+structured data+severity assessment(two shot)            | 0.706<br>(0.692-0.720) | 0.735 | 0.567 | 1.695 |
|                                        | Qwen+structured data+severity assessment(three shot)          | 0.713<br>(0.699-0.727) | 0.768 | 0.548 | 1.698 |
